# Supplementary material for: Potential future exposure of European land transport infrastructure to rainfall-induced landslides throughout the 21st century
Source: Copernicus journal article supplement (doi:10.5194/nhess-18-1121-2018), 2018-04-11
Supplement: Supplementary file 1 [file nhess-18-1121-2018-supplement.zip]

Archive with 2 entries (2 files):
- nhess-18-1121-2018-supplement-title-page.pdf
- toponyms.png
