# Supplementary material for: Potential future exposure of European land transport infrastructure to rainfall-induced landslides throughout the 21st century
Source: Copernicus journal article supplement (doi:10.5194/nhess-18-1121-2018), 2018-04-11
Supplement: Supplementary file 1 [file nhess-18-1121-2018-supplement.zip › nhess-18-1121-2018-supplement-title-page.pdf]

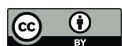

## *Supplement of*

# **Potential future exposure of European land transport infrastructure to rainfall-induced landslides throughout the 21st century**

**Matthias Schlögl and Christoph Matulla**

*Correspondence to:* Matthias Schlögl ([matthias.schloegl@ait.ac.at](mailto:matthias.schloegl@ait.ac.at)) and Christoph Matulla ([christoph.matulla@zamg.ac.at](mailto:christoph.matulla@zamg.ac.at))

- [nhess-18-1121-2018-supplement-title-page.pdf](#)
- [toponyms.png](#)

The copyright of individual parts of the supplement might differ from the CC BY 4.0 License.
